# Supplementary material
Source: publisher site journal article supplement (https://www.dovepress.com/article/414318)
Supplement: Supplementary file 1 [file get_supplementary_file.php]

**Supplementary table 1. Pain medication diary**

| **Date** | **NRS** | **Location** | **Pain description (blunt Pain, sharp pain, burning pain, electric shock pain, stabbing pain, etc.)** | **Duration of pain** | **Dosage of fentanyl transdermal patches（ μ G/h) and time** | **Outbreak pain frequency** | **Rescue medication used, dosage, and duration of administration** | **adverse reactions** |
| --- | --- | --- | --- | --- | --- | --- | --- | --- |
|  |  |  |  |  |  |  |  |  |
|  |  |  |  |  |  |  |  |  |
|  |  |  |  |  |  |  |  |  |
|  |  |  |  |  |  |  |  |  |
|  |  |  |  |  |  |  |  |  |
|  |  |  |  |  |  |  |  |  |
|  |  |  |  |  |  |  |  |  |
|  |  |  |  |  |  |  |  |  |
|  |  |  |  |  |  |  |  |  |
|  |  |  |  |  |  |  |  |  |
|  |  |  |  |  |  |  |  |  |
|  |  |  |  |  |  |  |  |  |
|  |  |  |  |  |  |  |  |  |
|  |  |  |  |  |  |  |  |  |
|  |  |  |  |  |  |  |  |  |
|  |  |  |  |  |  |  |  |  |
|  |  |  |  |  |  |  |  |  |

Instructions for filling in: Record the daily pain situation and pain relief measures based on the following table (if there is no pain occurring within 72 hours, the pain situation still needs to be recorded every 12 hours).
